# Supplementary material for: Interactions between stimulus and response types are more strongly represented in the entorhinal cortex than in its upstream regions in rats
Source: eLife. 2017 Dec 27;6:e32657. doi: 10.7554/eLife.32657 (PMC5771666; doi:10.7554/eLife.32657)
Supplement: Figure 2—source data 1. — Percent correct performance for individual rats under different drug conditions in the SCN-NSR task. [file elife-32657-fig2-data1.xlsx]

## Sheet: Sheet1
	SCN-NSR task (n=7)
	No.	Rat	Performance			Testing Period
			ACSF	PER MUS	POR MUS
	1	283	86	80	65	2015.04.06-04.16
	2	286	83	68	68	2015.04.06-04.09
	3	296	84	85	78	2015.06.11-06.17
	4	297	80	58	58	2015.06.14-06.17
	5	298	81	72	54	2015.08.01-08.07
	6	359	84	75	73	2016.01.02-01.06
	7	360	89	63	78	2016.01.05-01.08
