# Supplementary material for: Interactions between stimulus and response types are more strongly represented in the entorhinal cortex than in its upstream regions in rats
Source: eLife. 2017 Dec 27;6:e32657. doi: 10.7554/eLife.32657 (PMC5771666; doi:10.7554/eLife.32657)
Supplement: Figure 2—source data 2. — Percent correct performance for individual rats under different drug conditions in the SCN-SR task. [file elife-32657-fig2-data2.xlsx]

## Sheet: Sheet1
	SCN-SR task (n=8)
	No.	Rat	Performance			Testing Period
			ACSF	PER MUS	POR MUS
	1	352	94	80	83	2015.09.28-10.01
	2	355	90	83	88	2015.09.27-09.30
	3	373	96	95	80	2016.01.10-01.13
	4	375	97	75	78	2016.01.31-02.06
	5	422	94	90	85	2016.07.21-07.24
	6	423	90	83	63	2016.08.04-08.10
	7	428	93	90	83	2016.12.11-12.15
	8	429	95	73	70	2016.07.11-07.15
