# Supplementary material for: Interactions between stimulus and response types are more strongly represented in the entorhinal cortex than in its upstream regions in rats
Source: eLife. 2017 Dec 27;6:e32657. doi: 10.7554/eLife.32657 (PMC5771666; doi:10.7554/eLife.32657)
Supplement: Figure 3—figure supplement 1—source data 1. [file elife-32657-fig3-figsupp1-data1.xlsx]

## Sheet: Sheet1
	visual OBJ-NSR task (n=7)
	No.	Rat	Performance			Testing Period
			ACSF	PER MUS	POR MUS
	1	283	80	53	65	2015.03.01-03.04
	2	286	86	63	79	2015.02.21-03.01
	3	296	85	65	80	2015.05.24-05.27
	4	297	90	73	68	2015.05.26-05.29
	5	298	86	58	80	2015.07.11-07.14
	6	359	79	60	70	2015.12.03-12.06
	7	360	88	55	74	2015.12.08-12.11
