# Supplementary material for: Interactions between stimulus and response types are more strongly represented in the entorhinal cortex than in its upstream regions in rats
Source: eLife. 2017 Dec 27;6:e32657. doi: 10.7554/eLife.32657 (PMC5771666; doi:10.7554/eLife.32657)
Supplement: Figure 3—source data 1. — Percent correct performance for individual rats under different drug conditions in the OBJ-NSR task. [file elife-32657-fig3-data1.xlsx]

## Sheet: Sheet1
	OBJ-NSR task (n=7)
	No.	Rat	Performance			Testing Period
			ACSF	PER MUS	POR MUS
	1	283	94	58	90	2015.02.07-02.10
	2	286	94	75	100	2015.02.07-02.10
	3	296	91	50	83	2015.05.01-05.05
	4	297	94	95	93	2015.05.04-05.08
	5	298	90	73	93	2015.06.12-06.16
	6	359	92	53	93	2015.11.18-11.21
	7	360	86	73	83	2015.11.23-11.26
