# Supplementary material for: Interactions between stimulus and response types are more strongly represented in the entorhinal cortex than in its upstream regions in rats
Source: eLife. 2017 Dec 27;6:e32657. doi: 10.7554/eLife.32657 (PMC5771666; doi:10.7554/eLife.32657)
Supplement: Figure 3—source data 2. — Percent correct performance for individual rats under different drug conditions in the OBJ-SR task. [file elife-32657-fig3-data2.xlsx]

## Sheet: Sheet1
	OBJ-SR task (n=6)
	No.	Rat	Performance			Testing Period
			ACSF	PER MUS	POR MUS
	1	420	90	52	70	2017.04.03-04.06
	2	450	89	52	82	2017.01.29-02.01
	3	464	94	88	77	2017.05.14-05.25
	4	465	86	68	70	2017.05.27-05.31
	5	467	88	75	70	2017.05.30-06.03
	6	468	88	80	88	2017.07.31-08.04
