# Supplementary figures and images for: Interactions between stimulus and response types are more strongly represented in the entorhinal cortex than in its upstream regions in rats
Source: eLife journal article supplement (doi:10.7554/elife.32657), 2017-12-27

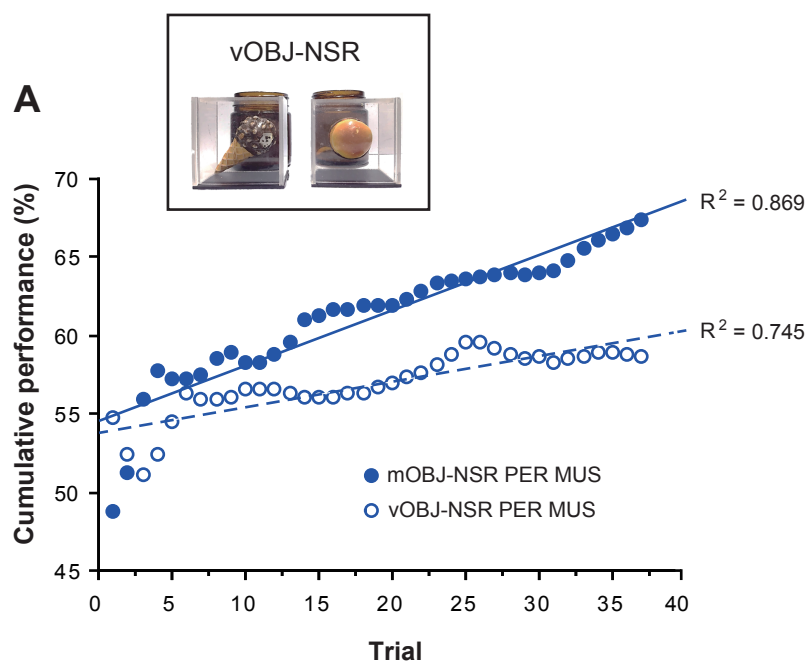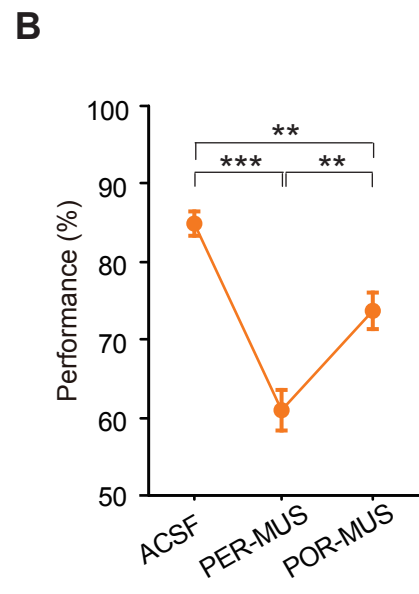

Supplementary Figure 1

Supplement: supp [file elife_poa_e32657_Figure_3_figure_supplement_1.pdf › elife_poa_e32657_Figure_3_figure_supplement_1.pdf]

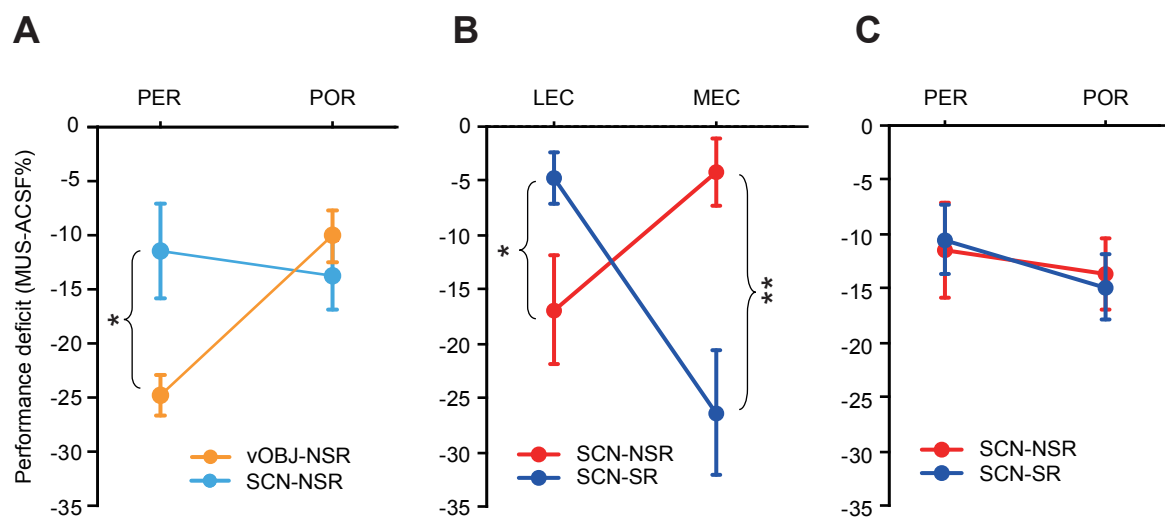

Supplementary Figure 2

Supplement: supp [file elife_poa_e32657_Figure_4_figure_supplement_1.pdf › elife_poa_e32657_Figure_4_figure_supplement_1.pdf]
